# Supplementary material for: Diiron carbonyl complexes possessing a {Fe(ii)Fe(ii)} core: synthesis, characterisation, and electrochemical investigation
Source: Royal Society of Chemistry journal article supplement (doi:10.1039/c0dt01465f), 2011-01-01
Supplement: c0dt01465f.pdf [file c0dt01465f.pdf]

## Electronic Supporting Information

Diiron carbonyl complexes possessing a {Fe(II)Fe(II)} core: synthesis,  
characterisation, and electrochemical investigation

Zhiyin Xiao,<sup>1</sup> Zhenhong Wei,<sup>2</sup> Li Long,<sup>2</sup> Yongli Wang,<sup>2</sup> David J. Evans,<sup>3</sup> Xiaoming  
Liu<sup>1,2</sup> \*

<sup>1</sup>School of Biological, Chemical Sciences and Engineering, Jiaying University,  
Jiaying 314001, China

<sup>2</sup>Department of Chemistry / Institute for Advanced Study, Nanchang University,  
Nanchang 330031, China

<sup>3</sup>Department of Biological Chemistry, John Innes Centre, Norwich NR4 7UH, United  
Kingdom

## Content

Figure S1 Mössbauer spectrum of complex **3** from powdered samples at 80 K

Figure S2 Mössbauer spectrum of complex **4** from powdered samples at 80 K.

Figure S3 FTIR of the reduction of **4** by 1.0 equiv.  $\text{LiEt}_3\text{BH}$  in DCM solution;

Figure S4 FTIR and CVs of complex **4** before / after electrolysis in DCM solution;

Figure S5 CVs of complex **4** in the absence / presence of acetic acid;

Figure S6 FTIR and electron absorption spectrum of **3**, **4**, **5** and **6**;

Figure S7  $^1\text{H}$  NMR spectrum of **3** in  $\text{CDCl}_3$ ;

Figure S8  $^1\text{H}$  NMR spectrum of **5** in  $\text{CDCl}_3$ ;

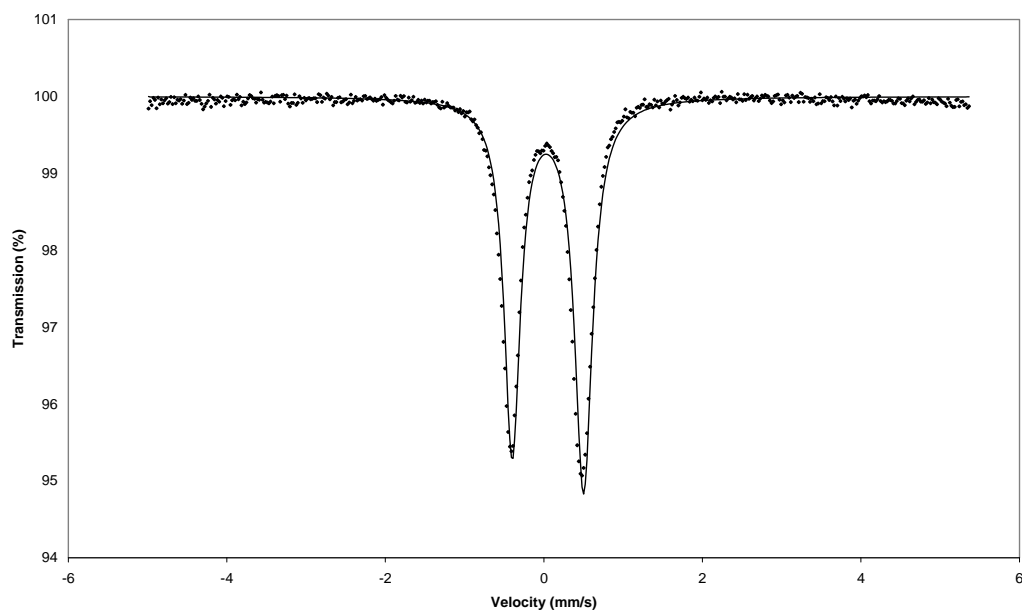

Figure S1 Mössbauer spectrum of complex **3** from powdered samples at 80 K.

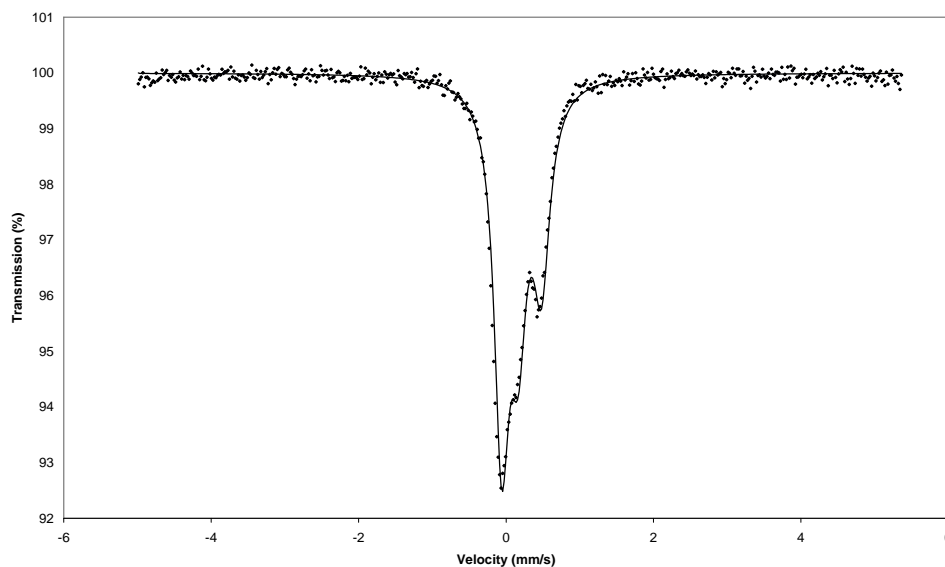

Figure S2 Mössbauer spectrum of complex **4** from powdered samples at 80 K.

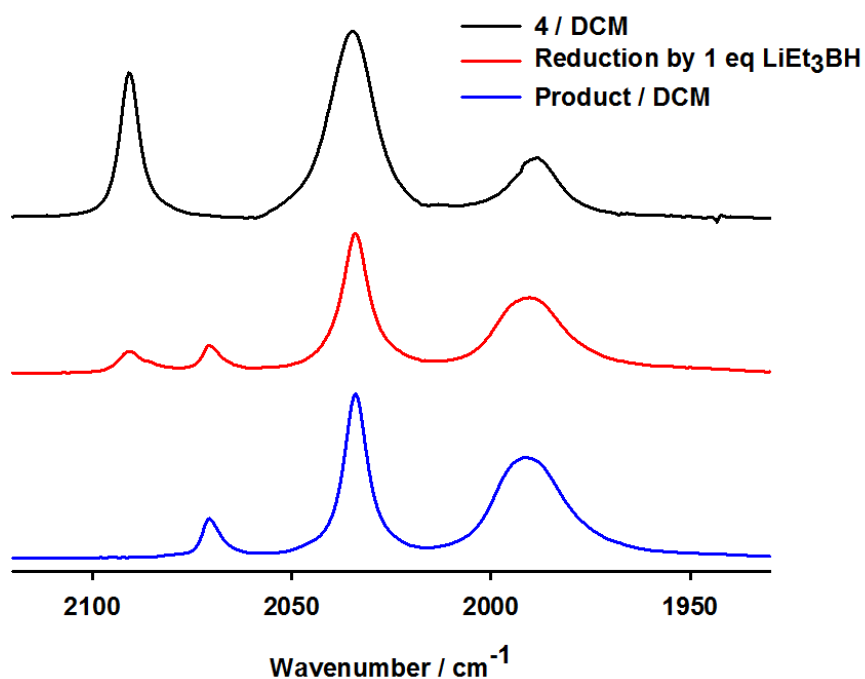

Figure S3 FTIR of the reduction of complex **4** by 1.0 equiv. LiEt<sub>3</sub>BH in dichloromethane solution under CO atmosphere at room temperature.

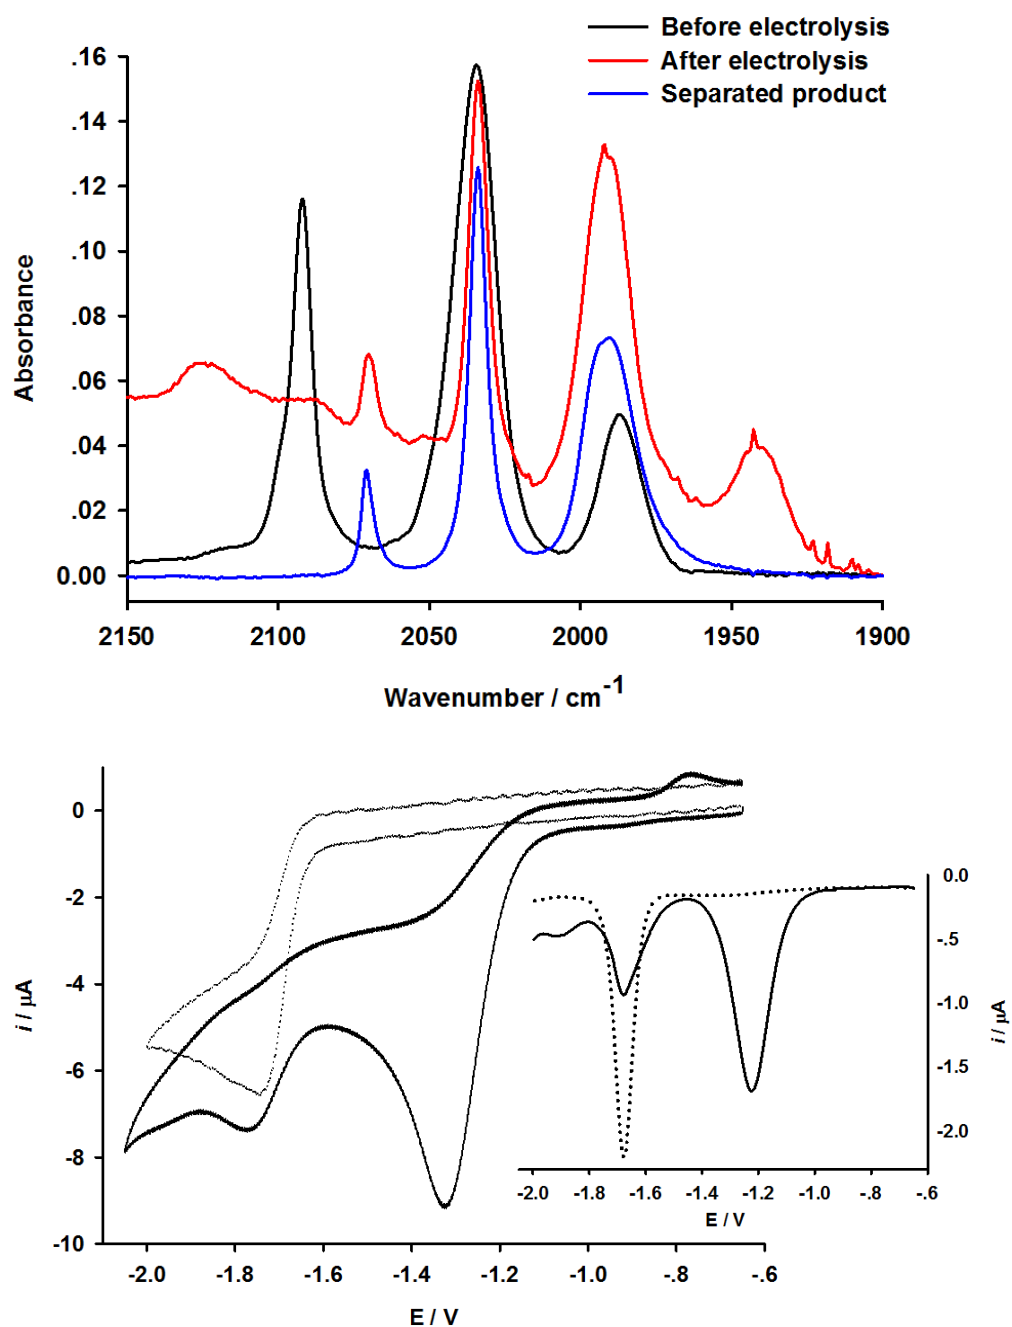

Figure S4 FTIR (top) and cyclic voltammograms (bottom) of complex **4** before / after electrolysis in  $0.5 \text{ mol L}^{-1}$   $[\text{NBu}_4]\text{BF}_4$ -dichloromethane solution at room temperature.

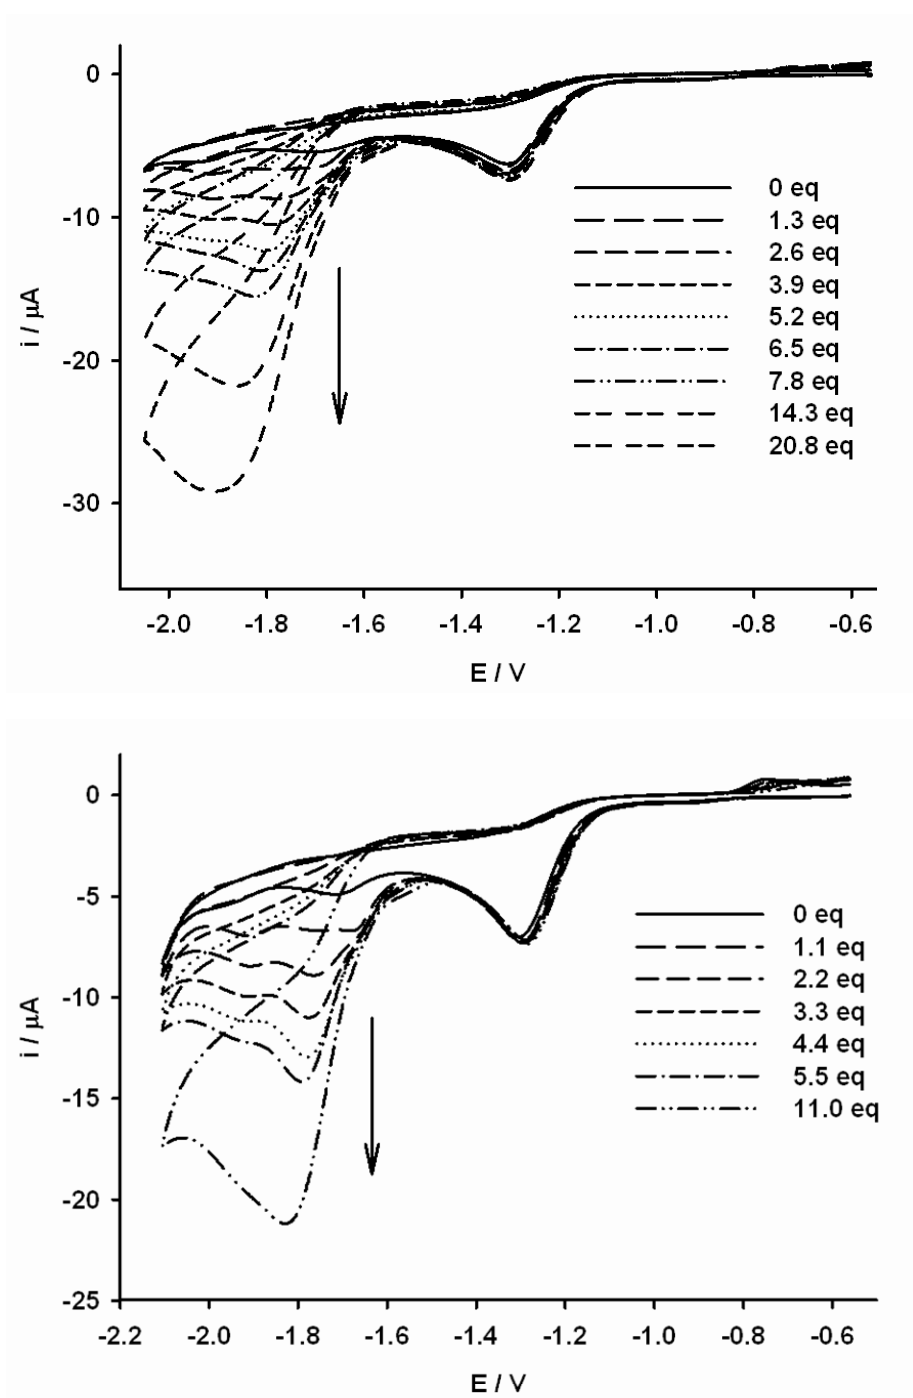

Figure S5 Cyclic voltammograms of complex **4** (top) and **6** (bottom) in the absence / presence of acetic acid in  $0.5 \text{ mol L}^{-1}$   $[\text{NBu}_4]\text{BF}_4$ -dichloromethane.

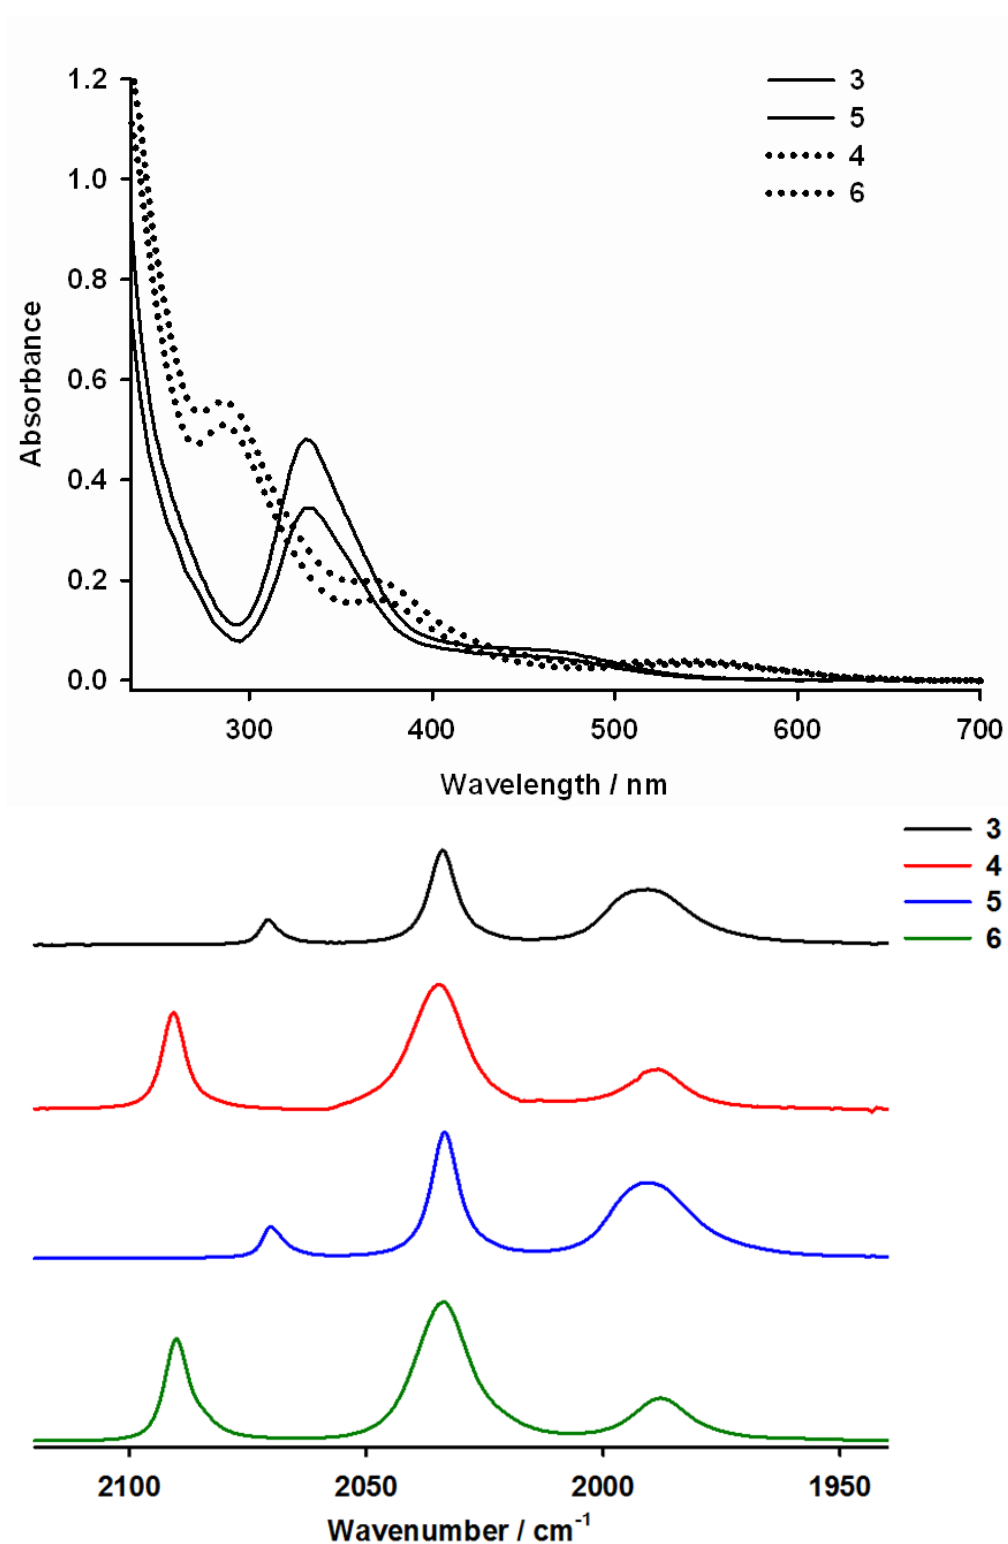

Figure S6 the electron absorption spectrum of **3**, **4**, **5** and **6** in hexanes (top) and FTIR of **3**, **4**, **5** and **6** in dichloromethane (bottom).

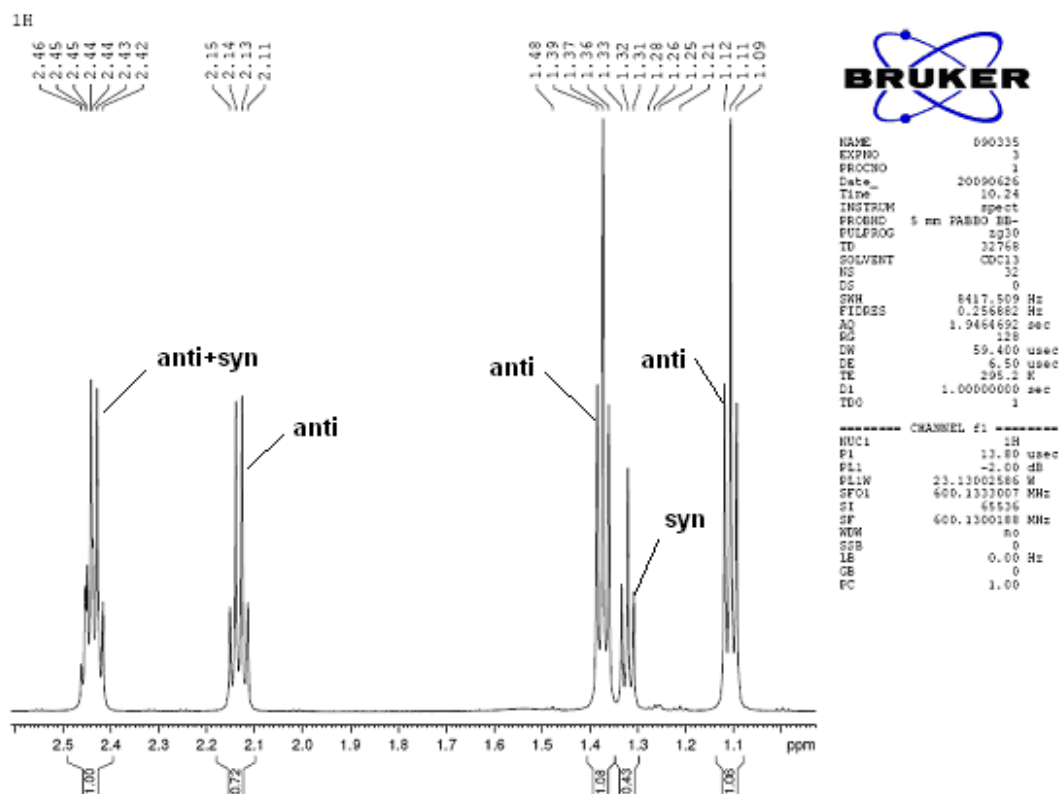

Figure S7  $^1\text{H}$  NMR spectrum of **3** in  $\text{CDCl}_3$  within two isomers (syn : anti = 1 : 5)

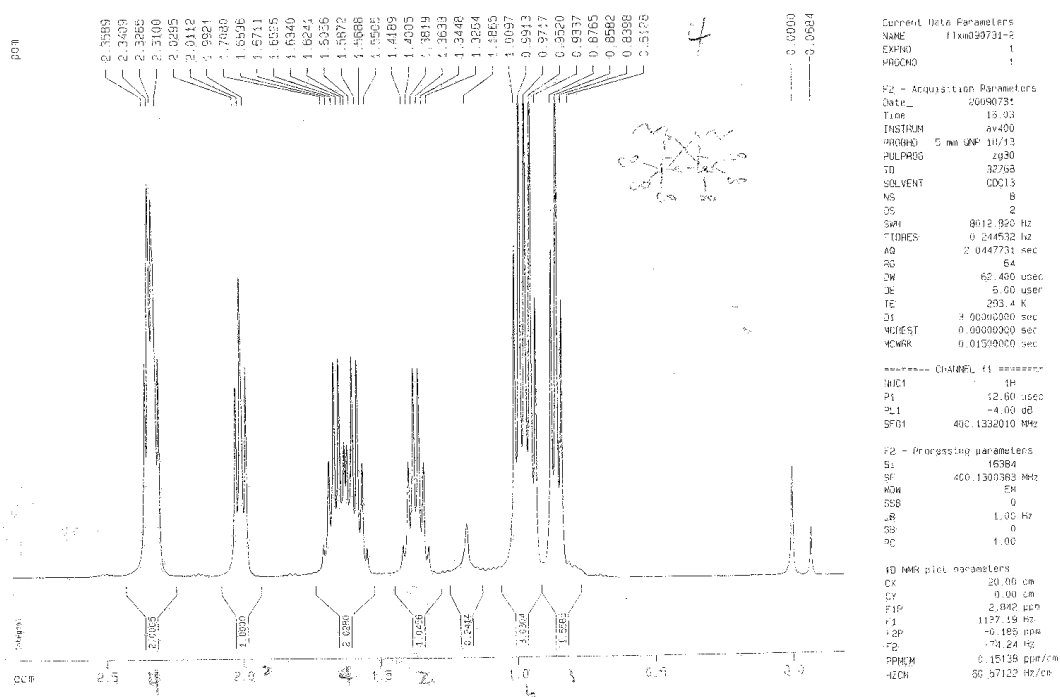

Figure S8 NMR spectrum of **6** in  $\text{CDCl}_3$  within two isomers (syn : anti = 1 : 2)
